# Supplementary material for: The relaxin receptor RXFP1 signals through a mechanism of autoinhibition
Source: bioRxiv or medRxiv preprint supplement (doi:10.1101/2022.01.22.477343), 2022-09-19
Supplement: Supplementary file [file media-1.pdf]

1 **Supplementary figures**

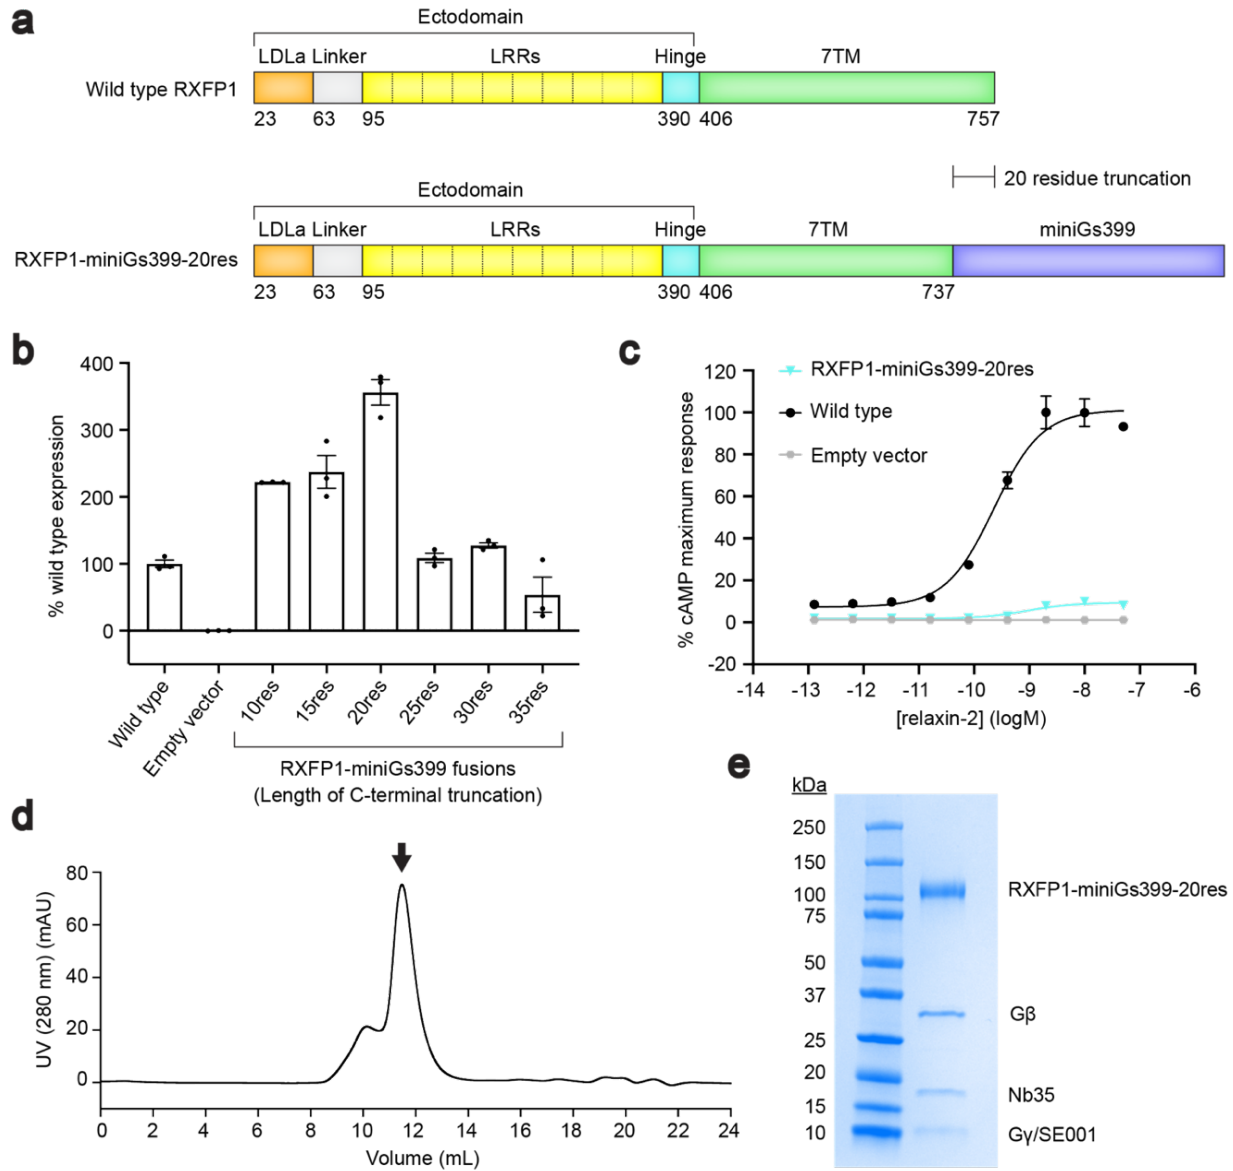

2

3 **Fig. S1 | Engineering and purification of the RXFP1-G<sub>s</sub> complex.** **a**, Diagram of the primary  
 4 structure of RXFP1 domains versus the RXFP1-miniG<sub>s</sub>399-20res fusion construct. **b**, Flow  
 5 cytometry cell surface expression tests in Expi293F tetR cells for RXFP1-miniG<sub>s</sub> fusion  
 6 constructs. Data is mean ± s.e.m., n=3 technical replicates. **c**, G<sub>s</sub> signaling assay comparing the  
 7 signaling levels of wild type RXFP1 versus RXFP1-miniG<sub>s</sub>399-20res in response to relaxin-2. **d**,  
 8 Size exclusion chromatography profile for the RXFP1-G<sub>s</sub> complex. Arrow indicates the peak  
 9 fractions pooled for RXFP1-G<sub>s</sub>. **e**, Coomassie-stained SDS-PAGE gel for the RXFP1-G<sub>s</sub>  
 10 complex.

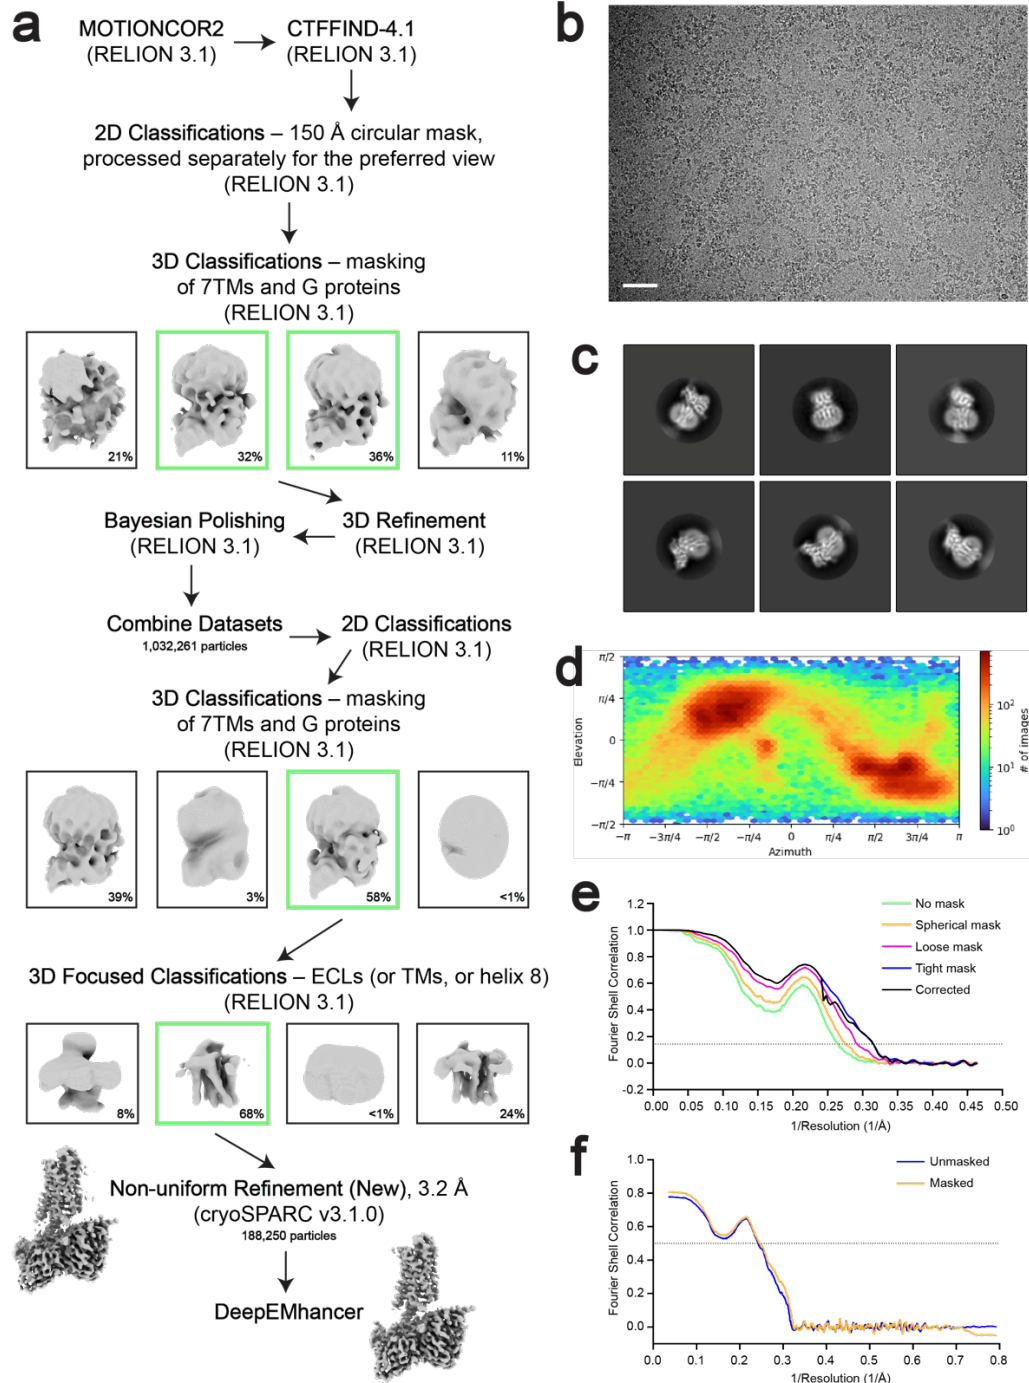

11  
 12 **Fig. S2 | Cryo-EM data processing for the 7TM domain of RXFP1–G<sub>s</sub>.** **a**, Cryo-EM data  
 13 processing scheme for the 7TM domain of RXFP1 in complex with G<sub>s</sub>. Shown are representative  
 14 processing steps for one of four individual datasets and the steps used for the combined datasets.  
 15 **b**, Representative micrograph from the RXFP1–G<sub>s</sub> complex datasets (Scale bar = 50 nm). **c**,  
 16 Two-dimensional class averages for the 7TM domain of RXFP1 and G proteins. **d**, Angular  
 17 distribution of particles in the final refinement for the 7TM domain with G proteins. **e**, Fourier  
 18 shell correlation (FSC) used to determine the overall map resolution. **f**, Map to model FSC curve.

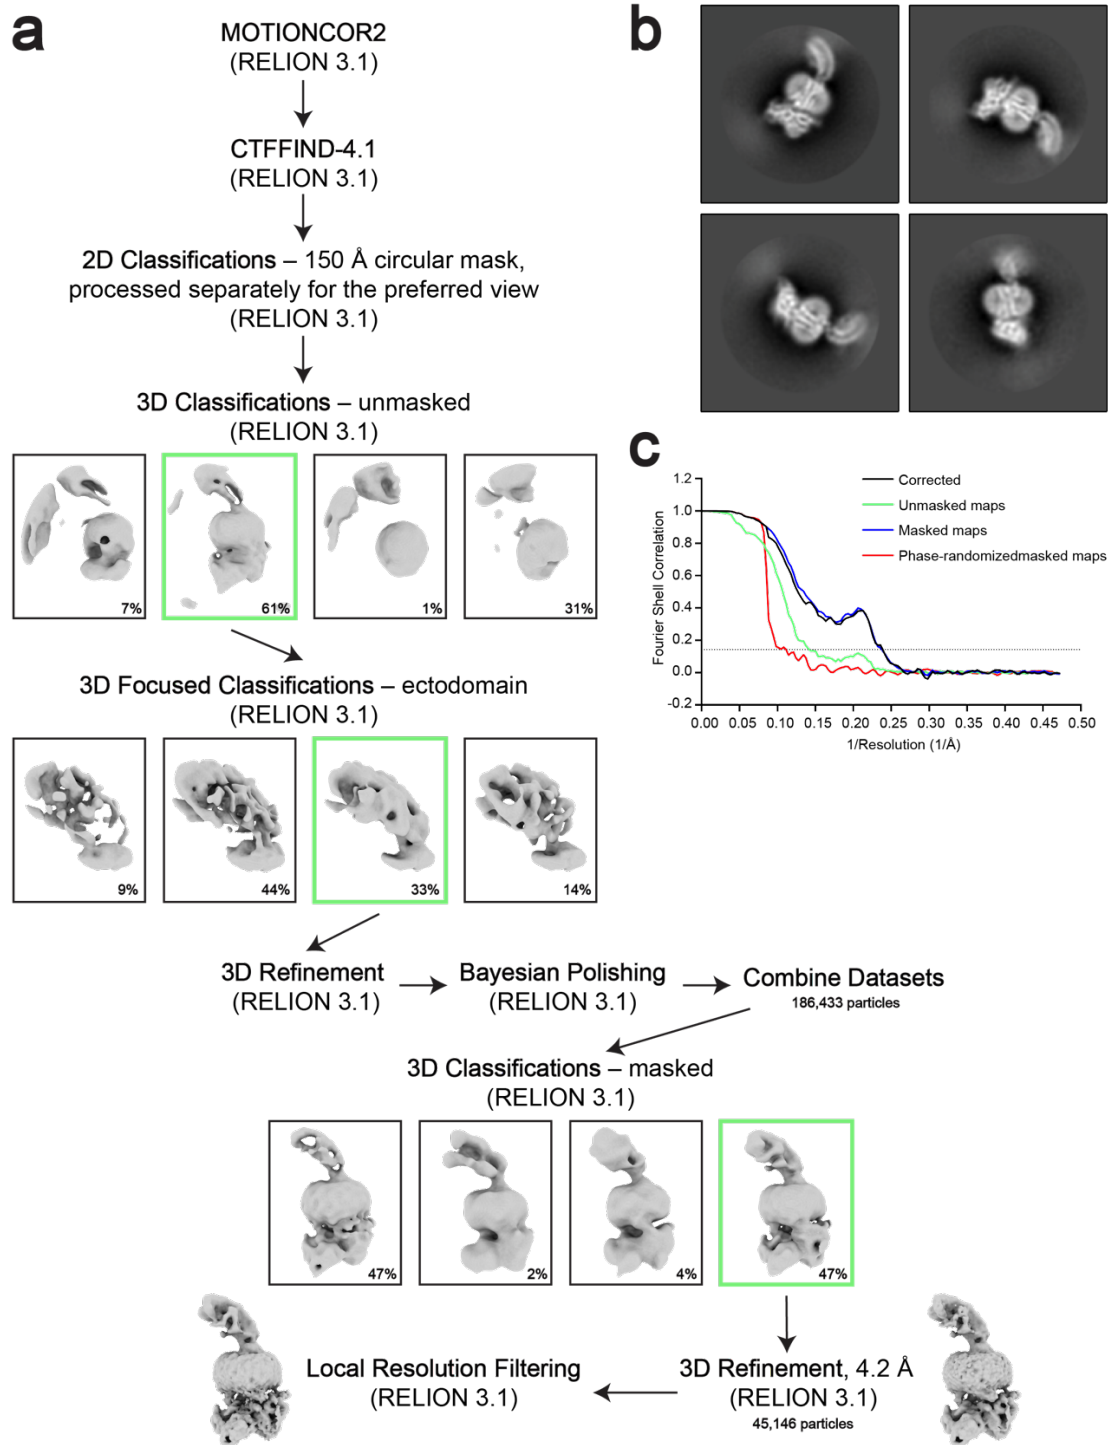

19  
20  
21  
22  
23  
24  
25

**Fig. S3 | Cryo-EM data processing for full-length RXFP1-G<sub>s</sub>.** **a**, Cryo-EM data processing scheme for the full-length RXFP1-G<sub>s</sub> complex. Shown are representative processing steps for one of four individual datasets and the steps used for the combined datasets. **b**, Two-dimensional class averages for the full-length RXFP1-G<sub>s</sub> complex. **c**, FSC used to determine the overall resolution of the map.

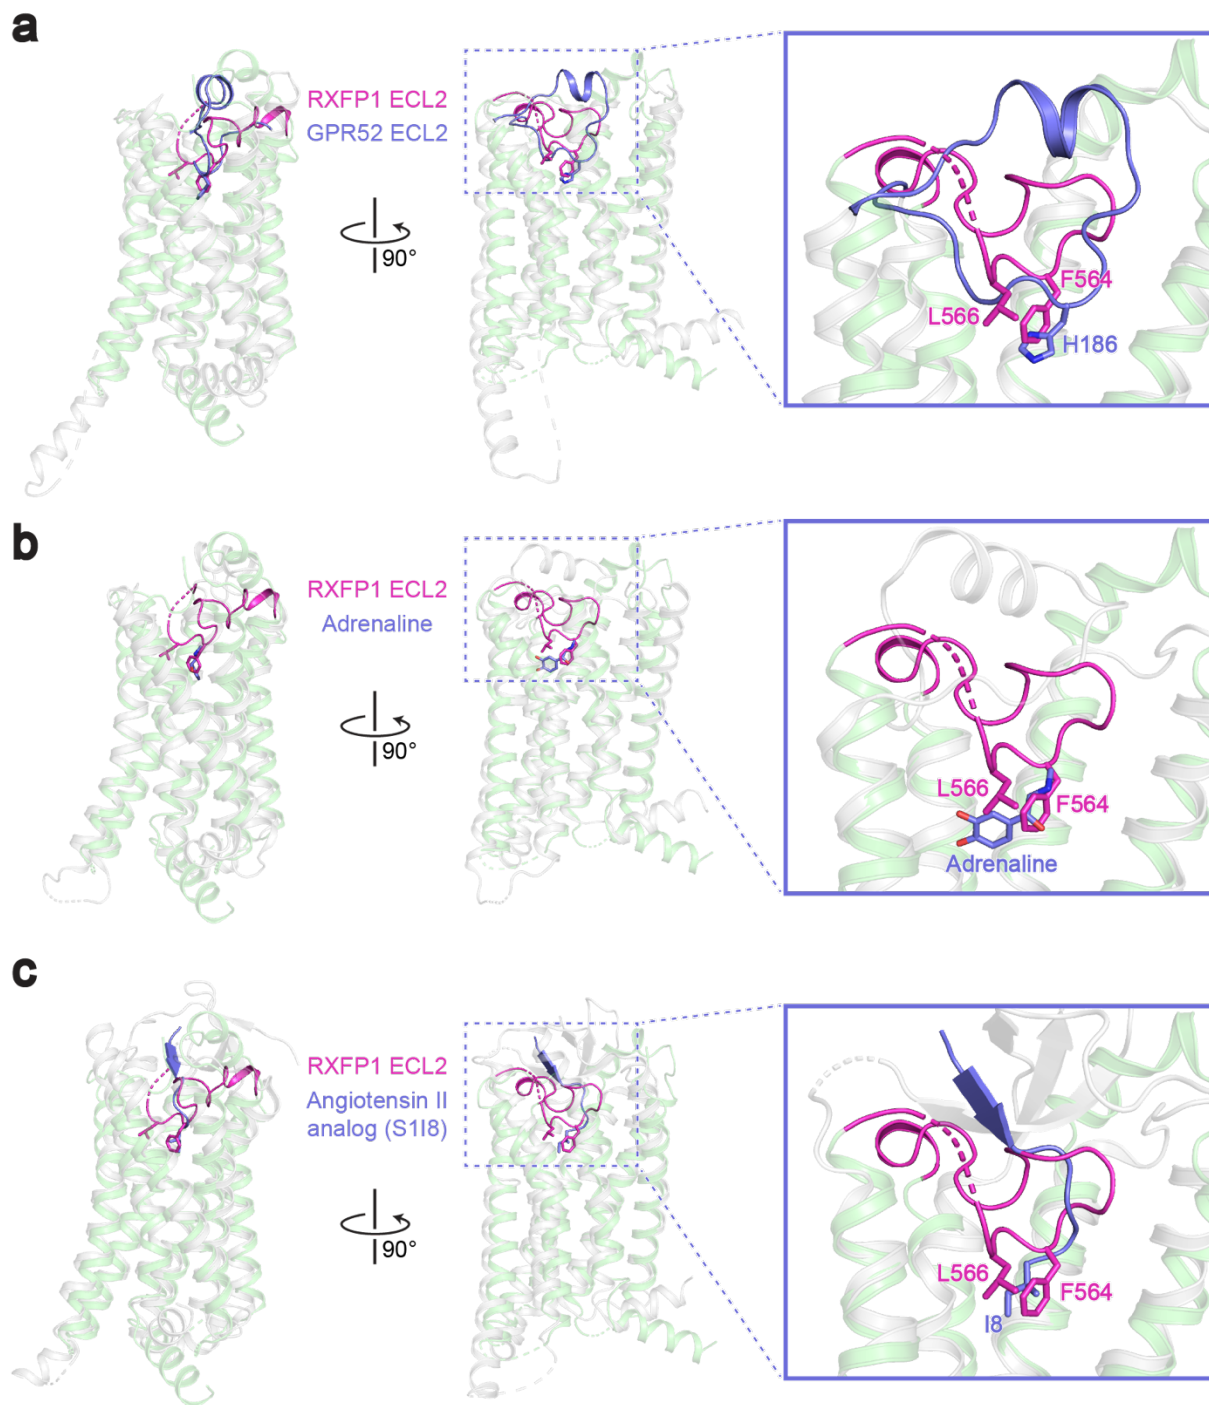

26

27 **Fig. S4 | Alignments of RXFP1's ECL2 with GPR52 and family A orthosteric agonists. a-c,**  
 28 Alignment of active-state RXFP1 (green, with ECL2 in magenta) with GPR52 (gray with ECL2  
 29 in purple; PDB ID: 6LI3)<sup>1</sup> (a), the  $\beta_2$  adrenergic receptor (gray) bound to adrenaline (purple;  
 30 PDB ID: 4LDO)<sup>2</sup> (b), and the angiotensin II type I receptor (gray) bound to the angiotensin II  
 31 analog S118 (purple; PDB ID: 6DO1)<sup>3</sup> (c).

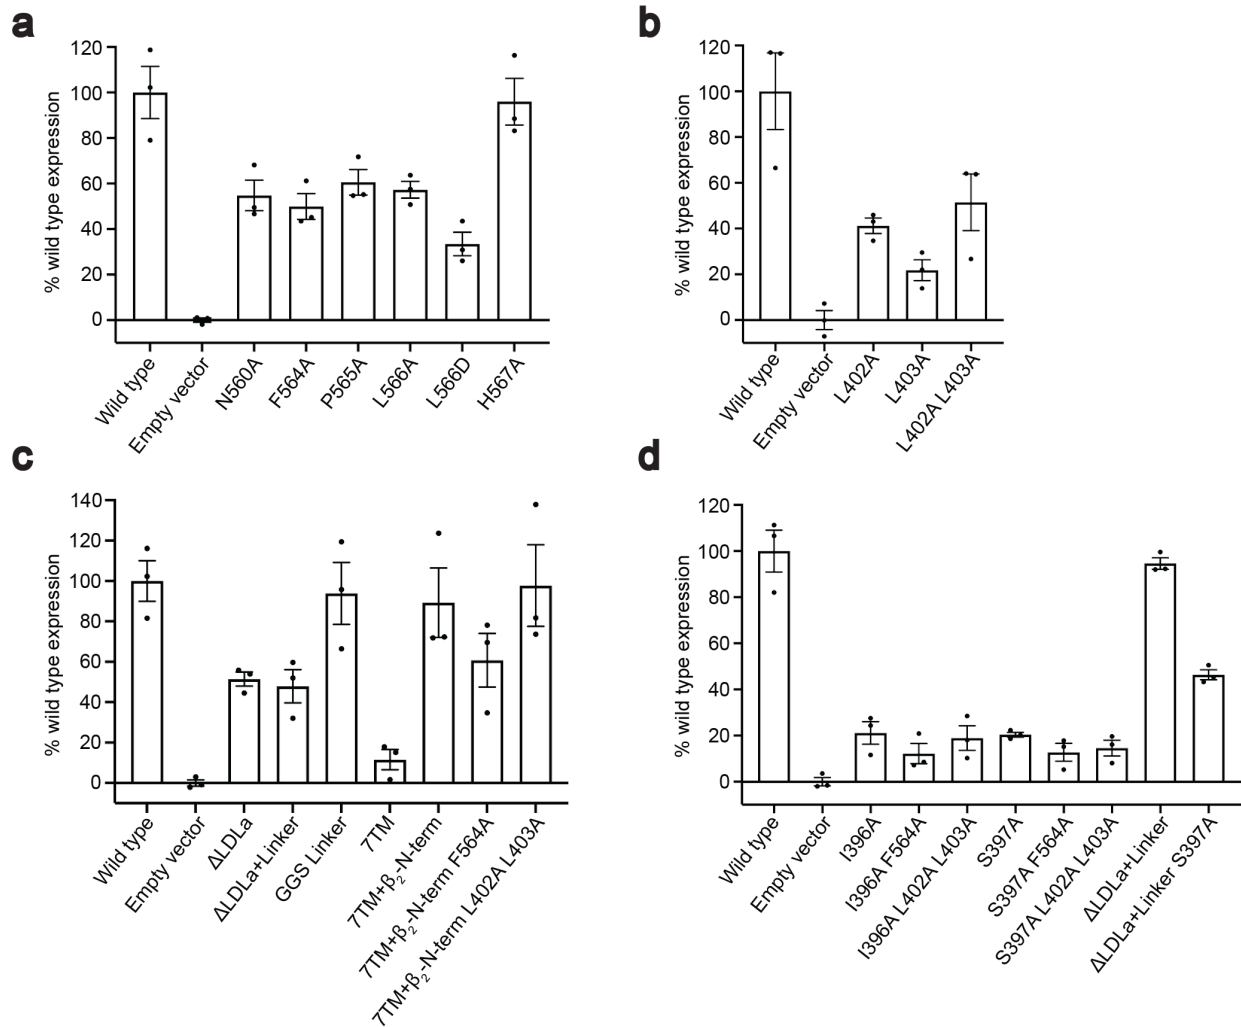

32

33 **Fig. S5 | Cell surface expression of RXFP1 constructs in Figure 2.5.** a-d, Flow cytometry cell  
 34 surface expression tests with HEK293T cells for RXFP1 ECL2 mutants (a), Leu402 and Leu403  
 35 hinge region mutants (b), ectodomain truncation constructs (c), and evolutionary coupling  
 36 analysis Ile396 and Ser397 hinge mutants (d). Data is mean  $\pm$  s.e.m., n=3 technical replicates.

37

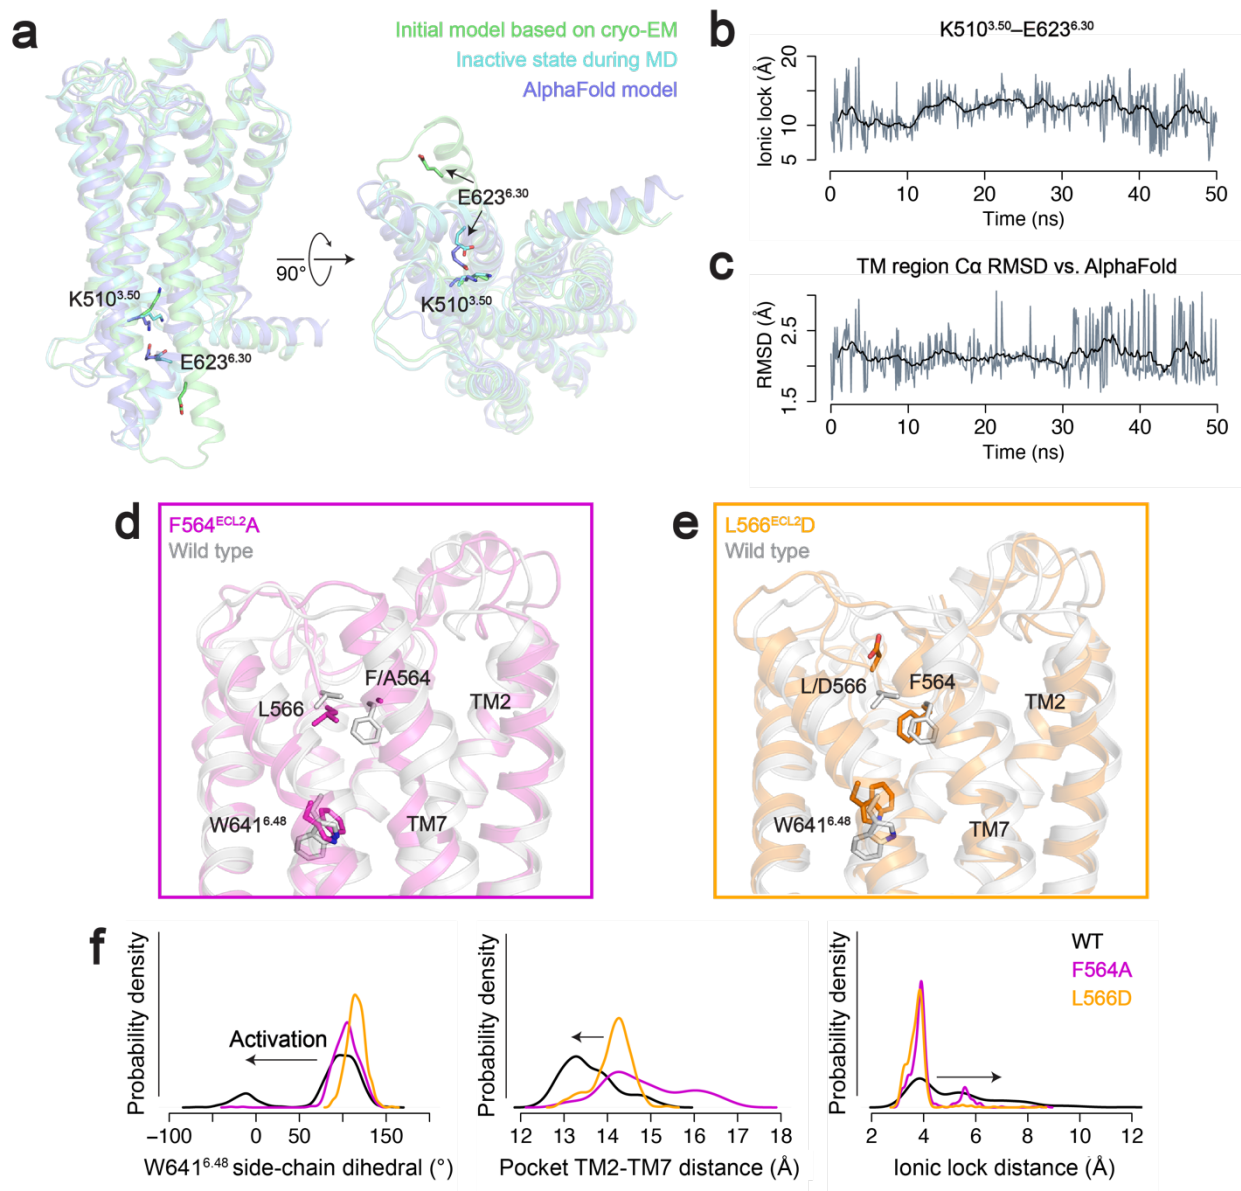

38  
 39 **Fig. S6 | Molecular dynamics of RXFP1.** a-c, The RXFP1 7TM domain alone is deactivated by  
 40 adding a sodium in the conserved sodium-binding site. d-e, The RXFP1 7TM domain alone  
 41 shows autoactivation starting from the inactive-state AlphaFold2 model. Autoactivation in these  
 42 simulations is impaired by the addition of the Phe564<sup>ECL2</sup> to Ala (d) or Leu566<sup>ECL2</sup> to Asp  
 43 mutations (e). f, Histograms describing activation-related differences in transmembrane  
 44 conformations between WT, F564<sup>ECL2</sup>A, and L566<sup>ECL2</sup>D RXFP1 models, including the distance  
 45 between TM2 and TM7, side-chain flips of the toggle switch residue W641<sup>6.48</sup>, and ionic lock  
 46 distance.  
 47

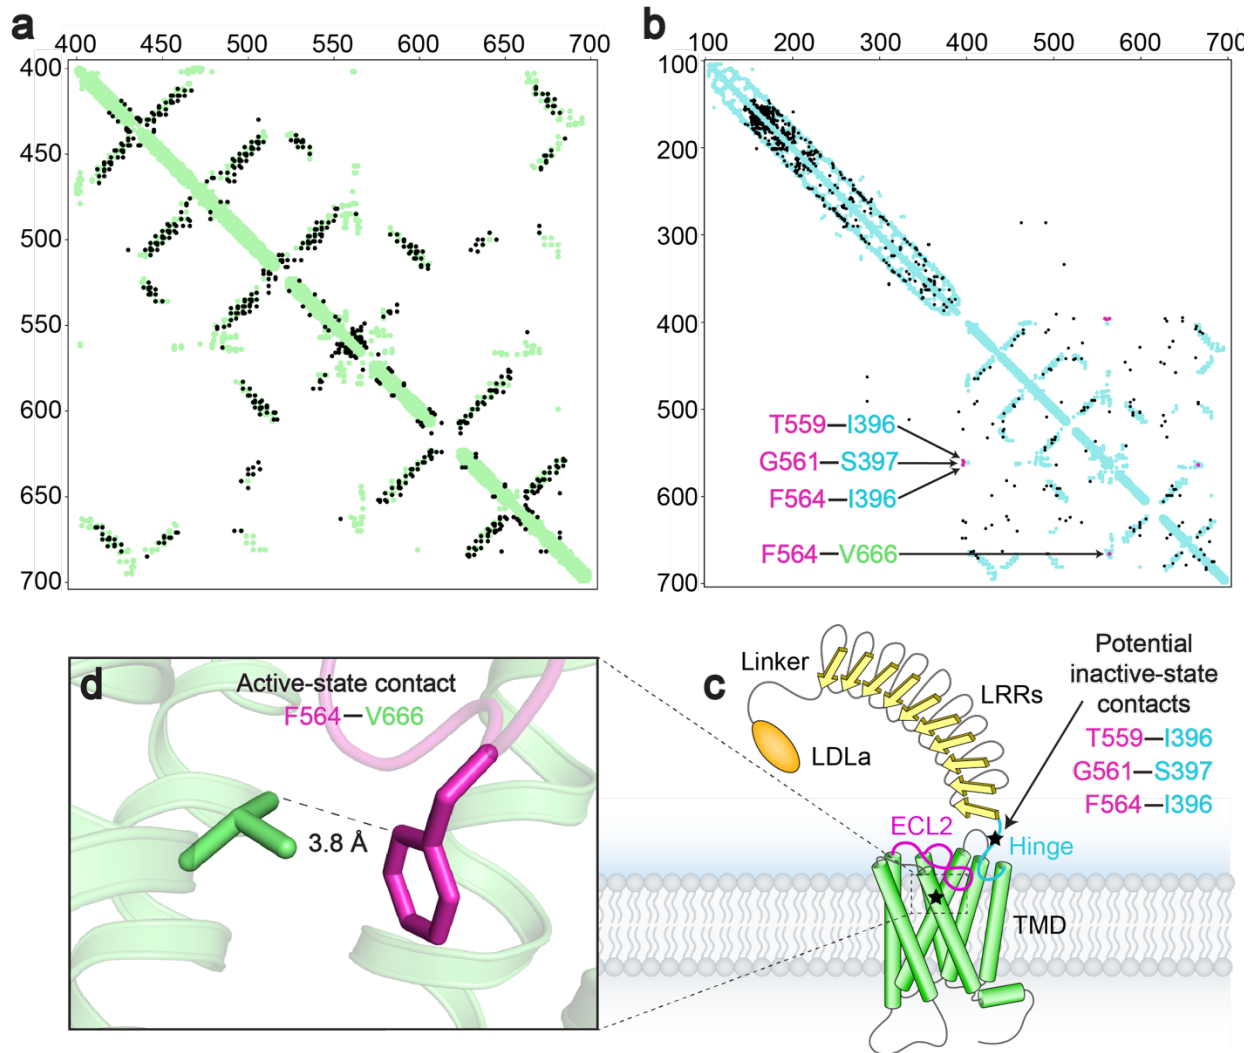

48

49 **Fig. S7 | Evolutionary coupling analysis of RXFP1.** **a**, Evolutionary couplings for RXFP1  
 50 residues 405-689 (black) compared to the active-state structure contacts (green) show close  
 51 agreement between predicted contacts from ECs and the cryo-EM model. **b**, Evolutionary  
 52 couplings for RXFP1 residues 120-757 (black) compared to the active-state 7TM structure and  
 53 LRR AlphaFold2<sup>4</sup> model contacts (blue), highlighting ECL2 evolutionary couplings that provide  
 54 insight into two potential loop conformations in magenta (T559<sup>ECL2</sup>-Ile396, Gly561<sup>ECL2</sup>-Ser397,  
 55 Phe564<sup>ECL2</sup>-Ile396, Phe564<sup>ECL2</sup>-Val666<sup>7,38</sup>). **c**, Diagram of RXFP1 domains. Stars indicate two  
 56 regions of ECL2 predicted contacts from ECs, TM7 and the hinge region. **d**, The Phe564<sup>ECL2</sup> and  
 57 Val666<sup>7,38</sup> residues from evolutionary coupling analysis are in close contact in the RXFP1  
 58 active-state structure.

59

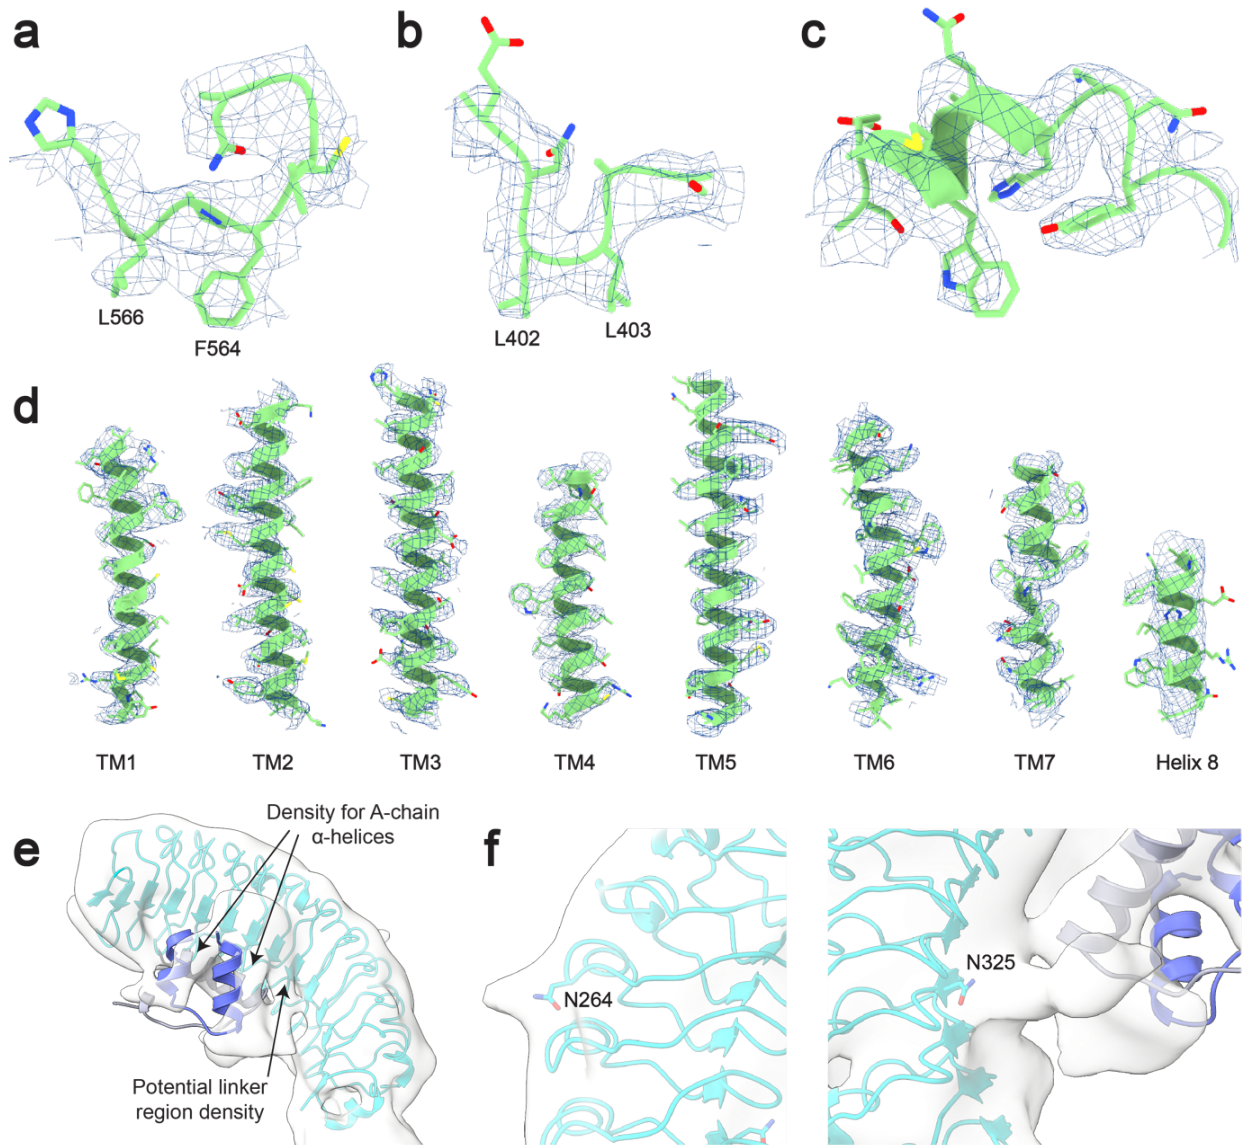

60

61 **Fig. S8 | Cryo-EM map quality and additional ectodomain map features.** a-c, Cryo-EM map  
 62 and model for ECL2 (a), the hinge region (b), and ECL1 (c). d, Cryo-EM map and models for  
 63 TMs 1-7 and Helix 8. e, Potential linker region density next to the relaxin-2 A-chain helices in  
 64 the low-resolution ectodomain cryo-EM map. f, Low-resolution features in the ectodomain cryo-  
 65 EM map at predicted sites of N-linked glycosylation.  
 66



67 **Supplementary tables**68 **Table S1 | Cryo-EM data collection, refinement, and validation statistics.**

69 Abbreviations: 7TM, RXFP1 masking the 7TM domain and G proteins; FL, full-length RXFP1

|                                               | <b>RXFP1-G<sub>s</sub>-7TM</b><br>(PDB 7TMW)<br>(EMDB-26003) | <b>RXFP1-G<sub>s</sub>-FL</b><br>(EMDB-26004) |
|-----------------------------------------------|--------------------------------------------------------------|-----------------------------------------------|
| <b>Cryo-EM data collection and processing</b> |                                                              |                                               |
| Magnification                                 | 81,000                                                       | 81,000                                        |
| Voltage (kV)                                  | 300                                                          | 300                                           |
| Electron exposure (e-/ Å <sup>2</sup> )       | ~52                                                          | ~52                                           |
| Defocus range (µm)                            | -0.8 to -2.3                                                 | -0.8 to -2.3                                  |
| Pixel size (Å)                                | 1.06                                                         | 1.06                                          |
| Symmetry                                      | C1                                                           | C1                                            |
| Initial particle images (no.)                 | 15,826,542                                                   | 15,826,542                                    |
| Final particle images (no.)                   | 188,250                                                      | 45,146                                        |
| Map resolution (Å)                            | 3.2                                                          | 4.2                                           |
| FSC threshold                                 | (0.143)                                                      | (0.143)                                       |
| <b>Model refinement and validation</b>        |                                                              |                                               |
| Initial model used (PDB)                      | Model generated from 6GDG chains B, C, D, and E              |                                               |
| Model resolution (Å)                          | 4.1                                                          |                                               |
| FSC threshold                                 | (0.5)                                                        |                                               |
| Map sharpening <i>B</i> factor                | DeepEMhancer                                                 |                                               |
| Model composition                             |                                                              |                                               |
| Non-hydrogen atoms                            | 7320                                                         |                                               |
| Protein residues                              | 930                                                          |                                               |
| Ligands                                       | 0                                                            |                                               |
| R.m.s. deviations                             |                                                              |                                               |
| Bond lengths (Å)                              | 0.003                                                        |                                               |
| Bond angles (Å)                               | 0.701                                                        |                                               |
| Validation                                    |                                                              |                                               |
| MolProbity score                              | 1.62                                                         |                                               |
| Clashscore                                    | 9.24                                                         |                                               |
| Poor rotamers (%)                             | 0.00                                                         |                                               |
| Ramachandran plot                             |                                                              |                                               |
| Favored (%)                                   | 97.35                                                        |                                               |
| Allowed (%)                                   | 2.65                                                         |                                               |
| Disallowed (%)                                | 0.00                                                         |                                               |

70 **Table S2 | G<sub>s</sub> signaling and expression data for RXFP1 constructs in Figure 2c,d.**

71 †Mean ± s.e.m., n=3 technical replicates.

72 ND, not determined.

| <b>Construct</b> | <b>pEC<sub>50</sub></b> | <b>E<sub>max</sub> (%)</b> | <b>Cell surface expression (%)<sup>†</sup></b> |
|------------------|-------------------------|----------------------------|------------------------------------------------|
| Wild type        | 9.8 ± 0.1               | 100 ± 2.3                  | 100 ± 12                                       |
| Empty vector     | ND                      | 1 ± 0.1                    | 0 ± 1                                          |
| N560A            | 9.3 ± 0.1               | 92 ± 2.6                   | 55 ± 7                                         |
| F564A            | 8.4 ± 0.1               | 16 ± 0.8                   | 50 ± 6                                         |
| P565A            | 8.6 ± 0.1               | 65 ± 3.6                   | 61 ± 6                                         |
| L566A            | 9.0 ± 0.1               | 77 ± 2.5                   | 57 ± 4                                         |
| L566D            | 8.0 ± 0.1               | 11 ± 0.4                   | 33 ± 5                                         |
| H567A            | 9.0 ± 0.05              | 96 ± 2.3                   | 96 ± 10                                        |
| Wild type        | 9.8 ± 0.1               | 100 ± 3.3                  | 100 ± 17                                       |
| Empty vector     | ND                      | 2 ± 0.1                    | 0 ± 4                                          |
| L402A            | 8.8 ± 0.1               | 32 ± 1.6                   | 41 ± 3                                         |
| L403A            | 8.8 ± 0.1               | 23 ± 0.7                   | 22 ± 5                                         |
| L402A L403A      | ND                      | 1 ± 0.05                   | 51 ± 12                                        |

73

74

75

76

77

78

79

80

81

82

83

84 **Table S3 | G<sub>s</sub> signaling and expression data for RXFP1 constructs in Figure 2e,f.**

85 †Mean ± s.e.m., n=3 technical replicates.

86 ‡Mean ± s.e.m., n=9 technical replicates.

| <b>Construct</b>                      | <b>Basal signaling (%)<sup>‡</sup></b> | <b>Relaxin-2 signaling (%)<sup>‡</sup></b> | <b>Cell surface expression (%)<sup>†</sup></b> |
|---------------------------------------|----------------------------------------|--------------------------------------------|------------------------------------------------|
| Wild type                             | 8 ± 0.6                                | 100 ± 5.3                                  | 100 ± 10                                       |
| Empty vector                          | 2 ± 0.2                                | 2 ± 0.1                                    | 0 ± 2                                          |
| ΔLDLa                                 | 8 ± 0.5                                | 9 ± 0.6                                    | 51 ± 3                                         |
| ΔLDLa+Linker                          | 10 ± 0.6                               | 10 ± 0.7                                   | 48 ± 8                                         |
| GGs Linker                            | 12 ± 0.6                               | 12 ± 0.7                                   | 94 ± 15                                        |
| 7TM                                   | 11 ± 0.5                               | 10 ± 0.5                                   | 12 ± 5                                         |
| 7TM+β <sub>2</sub> -Nterm             | 72 ± 3.2                               | 70 ± 3.1                                   | 89 ± 17                                        |
| 7TM+β <sub>2</sub> -Nterm F564A       | 1 ± 0.1                                | 1 ± 0.1                                    | 61 ± 13                                        |
| 7TM+β <sub>2</sub> -Nterm L402A L403A | 6 ± 0.1                                | 6 ± 0.2                                    | 98 ± 20                                        |
| Wild type                             | 9 ± 0.5                                | 100 ± 2.6                                  | 100 ± 9                                        |
| Empty vector                          | 1 ± 0.1                                | 1 ± 0.1                                    | 0 ± 2                                          |
| I396A                                 | 21 ± 1                                 | 27 ± 0.7                                   | 21 ± 5                                         |
| I396A F564A                           | 1 ± 0.1                                | 1 ± 0.1                                    | 12 ± 4                                         |
| I396A L402A L403A                     | 1 ± 0.1                                | 1 ± 0.1                                    | 19 ± 5                                         |
| S397A                                 | 55 ± 2.8                               | 71 ± 2.9                                   | 20 ± 1                                         |
| S397A F564A                           | 1 ± 0.1                                | 2 ± 0.1                                    | 13 ± 4                                         |
| S397A L402A L403A                     | 1 ± 0.1                                | 1 ± 0.1                                    | 15 ± 3                                         |
| ΔLDLa+Linker                          | 13 ± 0.7                               | 14 ± 0.5                                   | 95 ± 2                                         |
| ΔLDLa+Linker S397A                    | 77 ± 2.4                               | 79 ± 1.5                                   | 46 ± 2                                         |

87

88 **Table S4 | Binding and expression data for RXFP1 constructs in Figure 2.9e,f.**

89 †Mean ± s.e.m., n=3 technical replicates.

| <b>Construct</b> | <b>Fc-relaxin fusion binding (%)<sup>†</sup></b> | <b>Cell surface expression (%)<sup>†</sup></b> |
|------------------|--------------------------------------------------|------------------------------------------------|
| Wild type        | 100 ± 8                                          | 100 ± 9                                        |
| Empty vector     | 42 ± 7                                           | 101 ± 4                                        |
| E206A            | 0 ± 4                                            | 0 ± 0.5                                        |

90 **Supplementary references**

91

92 1. Lin, X. *et al.* Structural basis of ligand recognition and self-activation of orphan GPR52.  
93 *Nature* **579**, 152–157 (2020).

94 2. Ring, A. M. *et al.* Adrenaline-activated structure of  $\beta$ 2-adrenoceptor stabilized by an  
95 engineered nanobody. *Nature* **502**, 575–579 (2013).

96 3. Wingler, L. M., McMahon, C., Staus, D. P., Lefkowitz, R. J. & Kruse, A. C. Distinctive  
97 activation mechanism for angiotensin receptor revealed by a synthetic nanobody. *Cell*  
98 **176**, 479–490.e12 (2019).

99 4. Tunyasuvunakool, K. *et al.* Highly accurate protein structure prediction for the human  
100 proteome. *Nature* **596**, 590–596 (2021).

101

**Table S5 | Construct sequences**

| Name        | Sequence                                                                                                                                                                                                                                                                                                                                                                                                                                                                                                                                                                                                                                                                                                                                                                          |
|-------------|-----------------------------------------------------------------------------------------------------------------------------------------------------------------------------------------------------------------------------------------------------------------------------------------------------------------------------------------------------------------------------------------------------------------------------------------------------------------------------------------------------------------------------------------------------------------------------------------------------------------------------------------------------------------------------------------------------------------------------------------------------------------------------------|
| SE001       | MKTIIALSYIFCLVFAHHHHHDSWMEEVIKLCGRELVRAQIAICGMSTWSDAASSHSHSSARQLYSALANKCCHVGCTKRSLARFC                                                                                                                                                                                                                                                                                                                                                                                                                                                                                                                                                                                                                                                                                            |
| SE301       | MKTIIALSYIFCLVFAADKTHTCPPCPAPELLGGPSVFLFPPKPKDTLMISRTPEVTCVVVDVSHEDPEVKFNWYVDGVEVHNAKTKPREEQYQSTYRVVSVLTVLHQDWLNGKEYKCKVSNKALPAPIEKTISKAKGQPREPQVYTLPPSREEMTKNQVSLTCLVKGFYPSDIAVEWESNGQPENNYKTPPVLDSDGSFFLYSKLTVDKSRWQQGNVFCSTMHEALHNHYTQKSLSLSPGKGGSDSWKEEVIKLCGRELVRAQIAICGKSTASDAAGANANAGARQLYSALANKCCHVGCTKRSLARFC                                                                                                                                                                                                                                                                                                                                                                                                                                                            |
| WT RXFP1    | MKTIIALSYIFCLVFAADYKDDDDQDVKCSLGYFPCGNITKCLPQLLHCNGVDDCGNQADEDNC GDNNGWSLQFDKYFASYKMTSQYPFEAETPECLVGSVPVQCLCQGLELDCDETNLRAVPSVSSNVTAMSLQWNLIRKLPPDCFKNYHDLQKLYLQNNKITSISYAFRGLNSLTKLYLSHNRITFLKPGVFEDLHRLEWLIIEDNHLSRISPPTFYGLNSLILLVLMNNVLTRLPDKPLCQHMPRLHWLDLEGNHIHNLRLNLTIFISCSNLTVLVMRKNKINHLNENTFAPLQKLELDLGSNKIENLPPLIFKDLKELSQLNLSYNPIQKIQANQFDYLVKLSLSLEGIEISNIQRMFRPLMNLSHIYFKKFQYCGYAPHVRSCKPNTDGISSLENLLASIIQRFVWVSAVTCFGNIFVICMRPYIRSENKLYAMSIISLCCADCLMGIYLFVIGGFDLKFRGEYNKHAQLWMESTHCQLVGLAILSTEVSVLLLFTLTLEKYICIVYPFRCVPRGKCRITITVLILIWITGFIVAFIPLSNKEFFKNYYGTNGVCFPLHSEDTESIGAQIYSVAIFLGINLAAFIIIIVFSYGSMFYSVHQSAITATEIRNQVKKEMILAKRFFFIVFTDALCWIPFVVKFLLQVEIPGTITSWVIFILPINSALNPILYTLTTRPFKEMIHFRFWYNYRQRKSMDSKGGQKTYAPSF IWVEMWPLQEMPELMPDLFTYPCEMSLISQSTRLNSYS |
| RXFP1 N560A | MKTIIALSYIFCLVFAADYKDDDDQDVKCSLGYFPCGNITKCLPQLLHCNGVDDCGNQADEDNC GDNNGWSLQFDKYFASYKMTSQYPFEAETPECLVGSVPVQCLCQGLELDCDETNLRAVPSVSSNVTAMSLQWNLIRKLPPDCFKNYHDLQKLYLQNNKITSISYAFRGLNSLTKLYLSHNRITFLKPGVFEDLHRLEWLIIEDNHLSRISPPTFYGLNSLILLVLMNNVLTRLPDKPLCQHMPRLHWLDLEGNHIHNLRLNLTIFISCSNLTVLVMRKNKINHLNENTFAPLQKLELDLGSNKIENLPPLIFKDLKELSQLNLSYNPIQKIQANQFDYLVKLSLSLEGIEISNIQRMFRPLMNLSHIYFKKFQYCGYAPHVRSCKPNTDGISSLENLLASIIQRFVWVSAVTCFGNIFVICMRPYIRSENKLYAMSIISLCCADCLMGIYLFVIGGFDLKFRGEYNKHAQLWMESTHCQLVGLAILSTEVSVLLLFTLTLEKYICIVYPFRCVPRGKCRITITVLILIWITGFIVAFIPLSNKEFFKNYYGTAGVCFPLHSEDTESIGAQIYSVAIFLGINLAAFIIIIVFSYGSMFYSVHQSAITATEIRNQVKKEMILAKRFFFIVFTDALCWIPFVVKFLLQVEIPGTITSWVIFILPINSALNPILYTLTTRPFKEMIHFRFWYNYRQRKSMDSKGGQKTYAPSF IWVEMWPLQEMPELMPDLFTYPCEMSLISQSTRLNSYS |

---

RXFP1 F564A

MKTHIALSYIFCLVFADYKDDDDQDVKCSLGYFPCGNITKCLPQLLHCNGVDDCGNQADEDNC  
GDNNGWSLQFDKYFASYKMTSQYPFEAETPECLVGSVPVQCLCQGLELDCDETNLRAVPSV  
SSNVTAMSLQWNLIRKLPPDCFKNYHDLQKLYLQNNKITSISYAFRGLNSLTKLYLSHNRITFL  
KPGVFEDLHRLEWLIIEDNHLSTRISPTFYGLNSLILLVLMNNVLRPLDKPLCQHMPRLHWLDL  
EGNHIHNLRLNLTIFISCSNLTVLVMRKNKINHLNENTFAPLQKLDELDELGSNKIENLPPLIFKDLK  
ELSQLNLSYNPIQKIQANQFDYLVKLKSLLEGIEISNIQORMFRPLMNLSHIYFKKFQYCGYAP  
HVRCKPNTDGISSLENLLASIIQRVFWVWVSAVTCFGNIFVICMRPYIRSENKLYAMSIISLCCA  
DCLMGIYLFVIGGFDLKFGEYNKHAQLWMESTHCQLVGLAILSTEVSVLLLTFLTLEKYICIV  
YPFRCVRPGKCRITITVLILIWITGFIVAFIPLSNKEFFKNYYGTNGVCAPLHSEDTESIGAQIYSVA  
IFLGINLAAFIIIVFSYGSMFYSVHQSAITATEIRNQVKKEMILAKRFFFIVFTDALCWIPFVVKFL  
SLLQVEIPGTITSWVVIFILPINSALNPILYTLTTRPFKEMIHFRFWYNYRQRKSMDSKGQKTYAPS  
FIWVEMWPLQEMPELMKPDFTYPCEMSLISQSTRLNSYS

---

RXFP1 P565A

MKTHIALSYIFCLVFADYKDDDDQDVKCSLGYFPCGNITKCLPQLLHCNGVDDCGNQADEDNC  
GDNNGWSLQFDKYFASYKMTSQYPFEAETPECLVGSVPVQCLCQGLELDCDETNLRAVPSV  
SSNVTAMSLQWNLIRKLPPDCFKNYHDLQKLYLQNNKITSISYAFRGLNSLTKLYLSHNRITFL  
KPGVFEDLHRLEWLIIEDNHLSTRISPTFYGLNSLILLVLMNNVLRPLDKPLCQHMPRLHWLDL  
EGNHIHNLRLNLTIFISCSNLTVLVMRKNKINHLNENTFAPLQKLDELDELGSNKIENLPPLIFKDLK  
ELSQLNLSYNPIQKIQANQFDYLVKLKSLLEGIEISNIQORMFRPLMNLSHIYFKKFQYCGYAP  
HVRCKPNTDGISSLENLLASIIQRVFWVWVSAVTCFGNIFVICMRPYIRSENKLYAMSIISLCCA  
DCLMGIYLFVIGGFDLKFGEYNKHAQLWMESTHCQLVGLAILSTEVSVLLLTFLTLEKYICIV  
YPFRCVRPGKCRITITVLILIWITGFIVAFIPLSNKEFFKNYYGTNGVCFALHSEDTESIGAQIYSVA  
IFLGINLAAFIIIVFSYGSMFYSVHQSAITATEIRNQVKKEMILAKRFFFIVFTDALCWIPFVVKFL  
SLLQVEIPGTITSWVVIFILPINSALNPILYTLTTRPFKEMIHFRFWYNYRQRKSMDSKGQKTYAPS  
FIWVEMWPLQEMPELMKPDFTYPCEMSLISQSTRLNSYS

---

RXFP1 L566A

MKTHIALSYIFCLVFADYKDDDDQDVKCSLGYFPCGNITKCLPQLLHCNGVDDCGNQADEDNC  
GDNNGWSLQFDKYFASYKMTSQYPFEAETPECLVGSVPVQCLCQGLELDCDETNLRAVPSV  
SSNVTAMSLQWNLIRKLPPDCFKNYHDLQKLYLQNNKITSISYAFRGLNSLTKLYLSHNRITFL  
KPGVFEDLHRLEWLIIEDNHLSTRISPTFYGLNSLILLVLMNNVLRPLDKPLCQHMPRLHWLDL  
EGNHIHNLRLNLTIFISCSNLTVLVMRKNKINHLNENTFAPLQKLDELDELGSNKIENLPPLIFKDLK  
ELSQLNLSYNPIQKIQANQFDYLVKLKSLLEGIEISNIQORMFRPLMNLSHIYFKKFQYCGYAP  
HVRCKPNTDGISSLENLLASIIQRVFWVWVSAVTCFGNIFVICMRPYIRSENKLYAMSIISLCCA  
DCLMGIYLFVIGGFDLKFGEYNKHAQLWMESTHCQLVGLAILSTEVSVLLLTFLTLEKYICIV  
YPFRCVRPGKCRITITVLILIWITGFIVAFIPLSNKEFFKNYYGTNGVCFPAHSEDTESIGAQIYSVA

---

|             |                                                                                                                                                                                                                                                                                                                                                                                                                                                                                                                                                                                                                                                                                                                                                                                                                                              |
|-------------|----------------------------------------------------------------------------------------------------------------------------------------------------------------------------------------------------------------------------------------------------------------------------------------------------------------------------------------------------------------------------------------------------------------------------------------------------------------------------------------------------------------------------------------------------------------------------------------------------------------------------------------------------------------------------------------------------------------------------------------------------------------------------------------------------------------------------------------------|
|             | IFLGINLAAFIIIVFSYGSFMFYSVHQSAITATEIRNQVKKEMILAKRFFFIVFTDALCWIPFVVKFL<br>SLLQVEIPGTITSWVVIFILPINSALNPILYTLTTRPFKEMIHFRFWYNYRQRKSMDSKGQKTYAPS<br>FIWVEMWPLQEMPPELMKPDFTYPCEMSLISQSTRLNSYS                                                                                                                                                                                                                                                                                                                                                                                                                                                                                                                                                                                                                                                      |
| RXFP1 L566D | <b>MKTHALSIFCLVFADYKDDDD</b> QDVKCSLGYFPCGNITKCLPQLLHCNGVDDCGNQADEDNC<br>GDNNGWSLQFDKYFASYKMTSQYPFEAETPECLVGSVPVQCLCQGLELDCDETNLRAVPSV<br>SSNVTAMSLQWNLIRKLPPDCFKNYHDLQKLYLQNNKITSISYAFRGLNSLTKLYLSHNRITFL<br>KPGVFEDLHRLEWLIIEDNHLSRISPPTFYGLNSLILLVLMNNVLTRLPDKPLCQHMPRLHWLDL<br>EGNHIHNLRLNLTFIGSCSNLTVLVMRKNKINHLNENTFAPLQKLELDLGSNKIENLPPLIFKDLK<br>ELSQLNLSYNPIQKIQANQFDYLVKLKSLSLEGIEISNIQRMFRPLMNLSHIYFKKFQYCGYAP<br>HVRCKPNTDGISSLENLLASIIQRFVWVWSAVTCFGNIFVICMRPYIRSENKLYAMSIISLCCA<br>DCLMGIYLFVIGGFDLKFGEYNKHAQLWMESTHCQLVGSAILSTEVSLLLLTFLTLEKYICIV<br>YPFRCVRPGKCRITITVLILIWITGFIVAFIPLSNKEFFKNYYGTNGVCFP <b>D</b> HSEDTESIGAQIYSVA<br>IFLGINLAAFIIIVFSYGSFMFYSVHQSAITATEIRNQVKKEMILAKRFFFIVFTDALCWIPFVVKFL<br>SLLQVEIPGTITSWVVIFILPINSALNPILYTLTTRPFKEMIHFRFWYNYRQRKSMDSKGQKTYAPS<br>FIWVEMWPLQEMPPELMKPDFTYPCEMSLISQSTRLNSYS |
| RXFP1 H567A | <b>MKTHALSIFCLVFADYKDDDD</b> QDVKCSLGYFPCGNITKCLPQLLHCNGVDDCGNQADEDNC<br>GDNNGWSLQFDKYFASYKMTSQYPFEAETPECLVGSVPVQCLCQGLELDCDETNLRAVPSV<br>SSNVTAMSLQWNLIRKLPPDCFKNYHDLQKLYLQNNKITSISYAFRGLNSLTKLYLSHNRITFL<br>KPGVFEDLHRLEWLIIEDNHLSRISPPTFYGLNSLILLVLMNNVLTRLPDKPLCQHMPRLHWLDL<br>EGNHIHNLRLNLTFIGSCSNLTVLVMRKNKINHLNENTFAPLQKLELDLGSNKIENLPPLIFKDLK<br>ELSQLNLSYNPIQKIQANQFDYLVKLKSLSLEGIEISNIQRMFRPLMNLSHIYFKKFQYCGYAP<br>HVRCKPNTDGISSLENLLASIIQRFVWVWSAVTCFGNIFVICMRPYIRSENKLYAMSIISLCCA<br>DCLMGIYLFVIGGFDLKFGEYNKHAQLWMESTHCQLVGSAILSTEVSLLLLTFLTLEKYICIV<br>YPFRCVRPGKCRITITVLILIWITGFIVAFIPLSNKEFFKNYYGTNGVCFPL <b>A</b> SEDTESIGAQIYSVAI<br>FLGINLAAFIIIVFSYGSFMFYSVHQSAITATEIRNQVKKEMILAKRFFFIVFTDALCWIPFVVKFLS<br>LLQVEIPGTITSWVVIFILPINSALNPILYTLTTRPFKEMIHFRFWYNYRQRKSMDSKGQKTYAPSF<br>IWVEMWPLQEMPPELMKPDFTYPCEMSLISQSTRLNSYS |
| RXFP1 L402A | <b>MKTHALSIFCLVFADYKDDDD</b> QDVKCSLGYFPCGNITKCLPQLLHCNGVDDCGNQADEDNC<br>GDNNGWSLQFDKYFASYKMTSQYPFEAETPECLVGSVPVQCLCQGLELDCDETNLRAVPSV<br>SSNVTAMSLQWNLIRKLPPDCFKNYHDLQKLYLQNNKITSISYAFRGLNSLTKLYLSHNRITFL<br>KPGVFEDLHRLEWLIIEDNHLSRISPPTFYGLNSLILLVLMNNVLTRLPDKPLCQHMPRLHWLDL<br>EGNHIHNLRLNLTFIGSCSNLTVLVMRKNKINHLNENTFAPLQKLELDLGSNKIENLPPLIFKDLK<br>ELSQLNLSYNPIQKIQANQFDYLVKLKSLSLEGIEISNIQRMFRPLMNLSHIYFKKFQYCGYAP                                                                                                                                                                                                                                                                                                                                                                                                                    |

|                    |                                                                                                                                                                                                                                                                                                                                                                                                                                                                                                                                                                                                                                                                                                                                                                                                                                                                |
|--------------------|----------------------------------------------------------------------------------------------------------------------------------------------------------------------------------------------------------------------------------------------------------------------------------------------------------------------------------------------------------------------------------------------------------------------------------------------------------------------------------------------------------------------------------------------------------------------------------------------------------------------------------------------------------------------------------------------------------------------------------------------------------------------------------------------------------------------------------------------------------------|
|                    | HVRSCKPNTDGISSLEN <del>A</del> LASIIQRVFVWVVS AVTCFGNIFVICMRPYIRSENKLY AMSIISLCCA<br>DCLMGIYLFVIGGFDLKFGEYNKHAQLWMESTHCQLVGLSLAILSTEVSVLLLTFLTLEKYICIV<br>YFRCVVRPGKCRITITVLILIWITGFIVAFIPLSNKEFFKNYYGTNGVCFPLHSEDTESIGAQIYSVAI<br>FLGINLAAFIIVFSYGSMFYSVHQSAITATEIRNQVKKEMILAKRFFFIVFTDALCWIPFVVKFLS<br>LLQVEIPGTITSWVIFILPINSALNPILYTLTTRPFKEMIHFRFWYNYRQRKSMDSKGGQKTYAPSF<br>IWVEMWPLQEMPELMKPDFTYPCEMSLISQSTRLNSYS                                                                                                                                                                                                                                                                                                                                                                                                                                         |
| RXFP1 L403A        | <b>MKTIIALSYIFCLVFADYKDDDD</b> QDVKCSLGYFPCGNITKCLPQLLHCNGVDDCGNQAEDNC<br>GDNNGWSLQFDKYFASYKMTS QYPFEAETPECLVGSVPVQCLCQGLELDCDETNLRAVPSV<br>SSNVTAMSLQWNLIRKLPPDCFKNYHDLQKLYLQNNKITSISIIYAFRGLNSLTKLYLSHNRITFL<br>KPGVFEDLHRLEWLIIEDNHL SRISPPTFYGLNSLILLVLMNNVLTRL PDKPLCQHMPRLHWL DL<br>EGNHIHNL RNLT FISC SNLTVLVMRKNKINHLNENTFAPLQKLDLDEL DLSNKIENLPPLIFKDLK<br>ELSQLNLSYNPIQKIQANQFDYLVKLKSLSLEGIEISNIQRMFRPLMNL SHIYFKKFQYCGYAP<br>HVRSCKPNTDGISSLEN <del>A</del> ASIIQRVFVWVVS AVTCFGNIFVICMRPYIRSENKLY AMSIISLCCA<br>DCLMGIYLFVIGGFDLKFGEYNKHAQLWMESTHCQLVGLSLAILSTEVSVLLLTFLTLEKYICIV<br>YFRCVVRPGKCRITITVLILIWITGFIVAFIPLSNKEFFKNYYGTNGVCFPLHSEDTESIGAQIYSVAI<br>FLGINLAAFIIVFSYGSMFYSVHQSAITATEIRNQVKKEMILAKRFFFIVFTDALCWIPFVVKFLS<br>LLQVEIPGTITSWVIFILPINSALNPILYTLTTRPFKEMIHFRFWYNYRQRKSMDSKGGQKTYAPSF<br>IWVEMWPLQEMPELMKPDFTYPCEMSLISQSTRLNSYS |
| RXFP1 ΔLDLa        | <b>MKTIIALSYIFCLVFADYKDDDD</b> GDNNGWSLQFDKYFASYKMTS QYPFEAETPECLVGSVPV<br>QCLCQGLELDCDETNLRAVPSVSSNVTAMSLQWNLIRKLPPDCFKNYHDLQKLYLQNNKITSIS<br>IYAFRGLNSLTKLYLSHNRITFLKPGVFEDLHRLEWLIIEDNHL SRISPPTFYGLNSLILLVLMNN<br>VLTRL PDKPLCQHMPRLHWL DLEGNHIHNL RNLT FISC SNLTVLVMRKNKINHLNENTFAPLQ<br>KLDLDEL DLSNKIENLPPLIFKDLKELSQLNLSYNPIQKIQANQFDYLVKLKSLSLEGIEISNIQRM<br>FRPLMNL SHIYFKKFQYCGYAPHVRSCKPNTDGISSLENLLASIIQRVFVWVVS AVTCFGNIFV<br>ICMRPYIRSENKLY AMSIISLCCADCLMGIYLFVIGGFDLKFGEYNKHAQLWMESTHCQLVGS<br>LAILSTEVSVLLLTFLTLEKYICIVYFRCVVRPGKCRITITVLILIWITGFIVAFIPLSNKEFFKNYYG<br>TNGVCFPLHSEDTESIGAQIYSVAIFLGINLAAFIIVFSYGSMFYSVHQSAITATEIRNQVKKEMI<br>LAKRFFFIVFTDALCWIPFVVKFLSLLQVEIPGTITSWVIFILPINSALNPILYTLTTRPFKEMIH<br>FRFWYNYRQRKSMDSKGGQKTYAPSF IWVEMWPLQEMPELMKPDFTYPCEMSLISQSTRLNSYS                                                         |
| RXFP1 ΔLDLa+Linker | <b>MKTIIALSYIFCLVFADYKDDDD</b> CVLGSVPVQCLCQGLELDCDETNLRAVPSVSSNVTAMSLQ<br>WNLIRKLPPDCFKNYHDLQKLYLQNNKITSISIIYAFRGLNSLTKLYLSHNRITFLKPGVFEDLHR<br>LEWLIIEDNHL SRISPPTFYGLNSLILLVLMNNVLTRL PDKPLCQHMPRLHWL DLEGNHIHNL RN<br>LTFISC SNLTVLVMRKNKINHLNENTFAPLQKLDLDEL DLSNKIENLPPLIFKDLKELSQLNLSYNP                                                                                                                                                                                                                                                                                                                                                                                                                                                                                                                                                                |





---

GDNNGWSLQFDKYFASYKMTSQYPFEAETPECLVGSVPVQCLCQGLELDCDETNLRAVPSV  
SSNVTAMSLQWNLIRKLPPDCFKNYHDLQKLYLQNNKITSISYAFRGLNSLTKLYLSHNRITFL  
KPGVFEDLHRLEWLIIEDNHLSRISPPTFYGLNSLILLVLMNNVLTRLDPKPLCQHMPRLHWLDL  
EGNHIHNLRNLT FISC SNLTVLVMRKNKINHLNENTFAPLQKLDEL DLG SNKIENLPPLIFKDLK  
ELSQLNLSYNPIQKIQANQFDYLVKLSLSLEGIEISNIQORMFRPLMNL SHIYFKKFQYCGYAP  
HVRSCKPNTDGA SLENLLASIIQRVFWVVS AVTCFGNIFVICMRPYIRSENKLYAMSIISLCCA  
DCLMGIYLFVIGGFDLKFRGEYNKHAQLWMESTHCQLVGS LAILSTEVS VLLL TFL TLEKYICIV  
YPFRCVRPGKCR TITVLILIWITGFIVAFIPLSNKEFFKNYYGTNGVCFPLHSEDTESIGAQIYSVAI  
FLGINLAAFIII VFSYGS MFYSVHQSAITATEIRNQVKKEMILAKRFFFIVFTDALCWIPFVVKFLS  
LLQVEIPGTITSWV VIFILPINSALNPILYTLTTRPFKEMIHRFWYNYRQRKSMDSKGQKTYAPSF  
IWVEMWPLQEMPELMKPD LFTYPCEMSLISQSTRLNSYS

RXFP1 S397A

MKTHALSIFCLVFADYKDDDDQDVKCSLGYFPCGNITKCLPQLLHCNGVDDCGNQADEDNC  
GDNNGWSLQFDKYFASYKMTSQYPFEAETPECLVGSVPVQCLCQGLELDCDETNLRAVPSV  
SSNVTAMSLQWNLIRKLPPDCFKNYHDLQKLYLQNNKITSISYAFRGLNSLTKLYLSHNRITFL  
KPGVFEDLHRLEWLIIEDNHLSRISPPTFYGLNSLILLVLMNNVLTRLDPKPLCQHMPRLHWLDL  
EGNHIHNLRNLT FISC SNLTVLVMRKNKINHLNENTFAPLQKLDEL DLG SNKIENLPPLIFKDLK  
ELSQLNLSYNPIQKIQANQFDYLVKLSLSLEGIEISNIQORMFRPLMNL SHIYFKKFQYCGYAP  
HVRSCKPNTDGIASLENLLASIIQRVFWVVS AVTCFGNIFVICMRPYIRSENKLYAMSIISLCCA  
DCLMGIYLFVIGGFDLKFRGEYNKHAQLWMESTHCQLVGS LAILSTEVS VLLL TFL TLEKYICIV  
YPFRCVRPGKCR TITVLILIWITGFIVAFIPLSNKEFFKNYYGTNGVCFPLHSEDTESIGAQIYSVAI  
FLGINLAAFIII VFSYGS MFYSVHQSAITATEIRNQVKKEMILAKRFFFIVFTDALCWIPFVVKFLS  
LLQVEIPGTITSWV VIFILPINSALNPILYTLTTRPFKEMIHRFWYNYRQRKSMDSKGQKTYAPSF  
IWVEMWPLQEMPELMKPD LFTYPCEMSLISQSTRLNSYS

RXFP1 E206A

MKTHALSIFCLVFADYKDDDDQDVKCSLGYFPCGNITKCLPQLLHCNGVDDCGNQADEDNC  
GDNNGWSLQFDKYFASYKMTSQYPFEAETPECLVGSVPVQCLCQGLELDCDETNLRAVPSV  
SSNVTAMSLQWNLIRKLPPDCFKNYHDLQKLYLQNNKITSISYAFRGLNSLTKLYLSHNRITFL  
KPGVFEDLHRLEWLIADNHLSRISPPTFYGLNSLILLVLMNNVLTRLDPKPLCQHMPRLHWLD  
LEGNHIHNLRNLT FISC SNLTVLVMRKNKINHLNENTFAPLQKLDEL DLG SNKIENLPPLIFKDL  
KELSQLNLSYNPIQKIQANQFDYLVKLSLSLEGIEISNIQORMFRPLMNL SHIYFKKFQYCGYA  
PHVRSCKPNTDGISSLENLLASIIQRVFWVVS AVTCFGNIFVICMRPYIRSENKLYAMSIISLCC  
ADCLMGIYLFVIGGFDLKFRGEYNKHAQLWMESTHCQLVGS LAILSTEVS VLLL TFL TLEKYICI  
VYPFRCVRPGKCR TITVLILIWITGFIVAFIPLSNKEFFKNYYGTNGVCFPLHSEDTESIGAQIYSV  
AIFLGINLAAFIII VFSYGS MFYSVHQSAITATEIRNQVKKEMILAKRFFFIVFTDALCWIPFVVKF

---

|                                    |                                                                                                                                                                                                                                                                                                                                                                                                                                                                                                                                                                                                                                                                                                                                                                                                                                                                                                                                                                                                                                                                                                                                                                    |
|------------------------------------|--------------------------------------------------------------------------------------------------------------------------------------------------------------------------------------------------------------------------------------------------------------------------------------------------------------------------------------------------------------------------------------------------------------------------------------------------------------------------------------------------------------------------------------------------------------------------------------------------------------------------------------------------------------------------------------------------------------------------------------------------------------------------------------------------------------------------------------------------------------------------------------------------------------------------------------------------------------------------------------------------------------------------------------------------------------------------------------------------------------------------------------------------------------------|
|                                    | LSELLQVEIPGTITSWVVFILPINSALNPILYTLTTRPFKEMIHRFWYNYRQRKSMDSKGQKTYAP<br>SFIWVEMWPLQEMPPELMKPDLFYPCEMSLISQSTRLNSYS                                                                                                                                                                                                                                                                                                                                                                                                                                                                                                                                                                                                                                                                                                                                                                                                                                                                                                                                                                                                                                                    |
| RXFP1-miniG <sub>s</sub> 399-20res | <b>MKTHALS</b> <b>YIFCLVFADYKDDDD</b> GGG <b>SLVLFQGP</b> GGSQDVKCSLGYFPCGNITKCLPQLLHCNG<br>VDDCGNQADEDNCGDNNGWSLQFDKYFASYKMTSQYPFEAETPECLVGSVPVQCLCQGLE<br>LDCDETNLRAVPSVSSNVTAMSLQWNLIRKLPPDCFKNYHDLQKLYLQNNKITSISIIYAFRGLN<br>SLTKLYLSHNRITFLKPGVFEDLHRLWLIIEDNHLSRISPPTFYGLNSLILLVLMNNVLTRL PDK<br>PLCQHMPRLHWLDLEGNHIIHNLRLNLT FISC SNLTVLVMRKNKINHLNENTFAPLQKLDEL DLG<br>SNKIENLPPLIFKDLKELSQLNLSYNPIQKIQANQFDYLVKLSLSLEGIEISNIQORMFRPLMNLS<br>HIYFKKFQYCGYAPHVRSCKPNTDGISSLENLLASIIQRVFWVWVSAVTCFGNIFVICMRPYIRSE<br>NKLYAMSIISLCCADCLMGIYLFVIGGFDLKFRGEYNKHAQLWMESTHCQLVGLAILSTEVS<br>LLL TFL TLEKYICIVYPFRCVPRGKCR TITVLILIWITGFIVAFIPLSNKEFFKNYYGTNGVCFPLHS<br>EDTESIGAQIYSVAIFLGINLAAFIIIVFSYGS MFYSVHQS AITATEIRNQVKKEMILAKRFFFIVFT<br>DALCWIPFVVKFLSLLQVEIPGTITSWVVFILPINSALNPILYTLTTRPFKEMIHRFWYNYRQRK<br>SMDSKGQKTYAPSFIWVEMWPLQEMPPELMKPD <b>LSKTEDQRNEEK AQREANKKIEKQLQD</b><br><b>KQVYRATHRLLLLGADNSGKSTIVKQMRIYHGGSGGSGGTSGIFETKFQVDK VNFHMFVGG</b><br><b>QRDERRKWIQCFNDVTAIFVVDSSDYNRLQEALNLFKSIWNNRWLRTISVILFNKQDLLAEK</b><br><b>VLAGKSKIEDYFPEFARYTTPEDATPEPGEDPRVTRAKYFIRDEFRLISTASGDGRHYCYPHFTC</b><br><b>AVDTENARRIFNDCRDIIQRMHLRQYELL</b> |
| Nb35-His-PrC                       | <b>MKYLLPTAAAGLLLLAAQPAMAQVQLQESGGGLVQPGGSLRLSCAASGFTFSNYKMNWVRQ</b><br>APGKGLEWVSDISQSGARISYTG SVKGRFTISRDN AKNTLYLQMNSLKPEDTAVYYCARCPAPF<br>TRDCFDVTSTTYAYRGQGTQVTVSSLEVL FQGP <b>GGHHHHHHHGGSE</b> <b>DQVDPRLIDGK</b>                                                                                                                                                                                                                                                                                                                                                                                                                                                                                                                                                                                                                                                                                                                                                                                                                                                                                                                                           |
| Gβ                                 | <b>MHHHHHHH</b> GSSGSELDQLRQEAQLKNQIRDARKACADATLSQITNNIDPVGRIQMRTRRTL RG<br>HLAKIYAMHWGTDSRLLVSASQDGKLIWDSYTTNKVHAIPLRSSWVMTCA YAPSGNYVACG<br>GLDNICSIYNLKTREGNVRVSREL AGHTGYLSCCRFLDDNQIVTSSGDTTCALWDIETGQQT T<br>FTGHTGDVMSLSLAPDTRLFVSGACDASAKLWDVREGMCRQFTFGHESDINAICFFPNGNAFA<br>TGSDDATCRLFDLRADQELMTYSHDNIICGITSVSFSKSGRLLLAGYDDFNCNVWDALKADRA<br>GVLAGHDNRVSLGVTDDGMAVATGSWDSFLKIWN                                                                                                                                                                                                                                                                                                                                                                                                                                                                                                                                                                                                                                                                                                                                                                        |
| Gγ                                 | MASNNTASIAQARKLVEQLKMEANIDRIKVS KAAADLMAYCEAHAKEDPLLTPVPA SENPFRE<br>KKFFCAIL                                                                                                                                                                                                                                                                                                                                                                                                                                                                                                                                                                                                                                                                                                                                                                                                                                                                                                                                                                                                                                                                                      |

102

103 **Legend:**

104 Hemagglutinin signal sequence, His-tag, Human IgG1 Fc N297Q, FLAG tag, Linker residues (not RXFP1 domain)

105 β<sub>2</sub> adrenergic receptor N-terminus, 3C protease cleavage site, miniG<sub>s</sub>399, pelB signal sequence, Protein C tag, Mutations
